# Supplementary material for: Tumors cells with mismatch repair deficiency induce hyperactivation of pyroptosis resistant to cell membrane damage but are more sensitive to co-treatment of IFN-γ and TNF-α to PANoptosis
Source: PubMed Central journal article supplement (PMC11091123; doi:10.1038/s41420-024-01984-7), 2024-05-13
Supplement: 41420_2024_1984_MOESM1_ESM.pdf [file 41420_2024_1984_MOESM1_ESM.pdf]

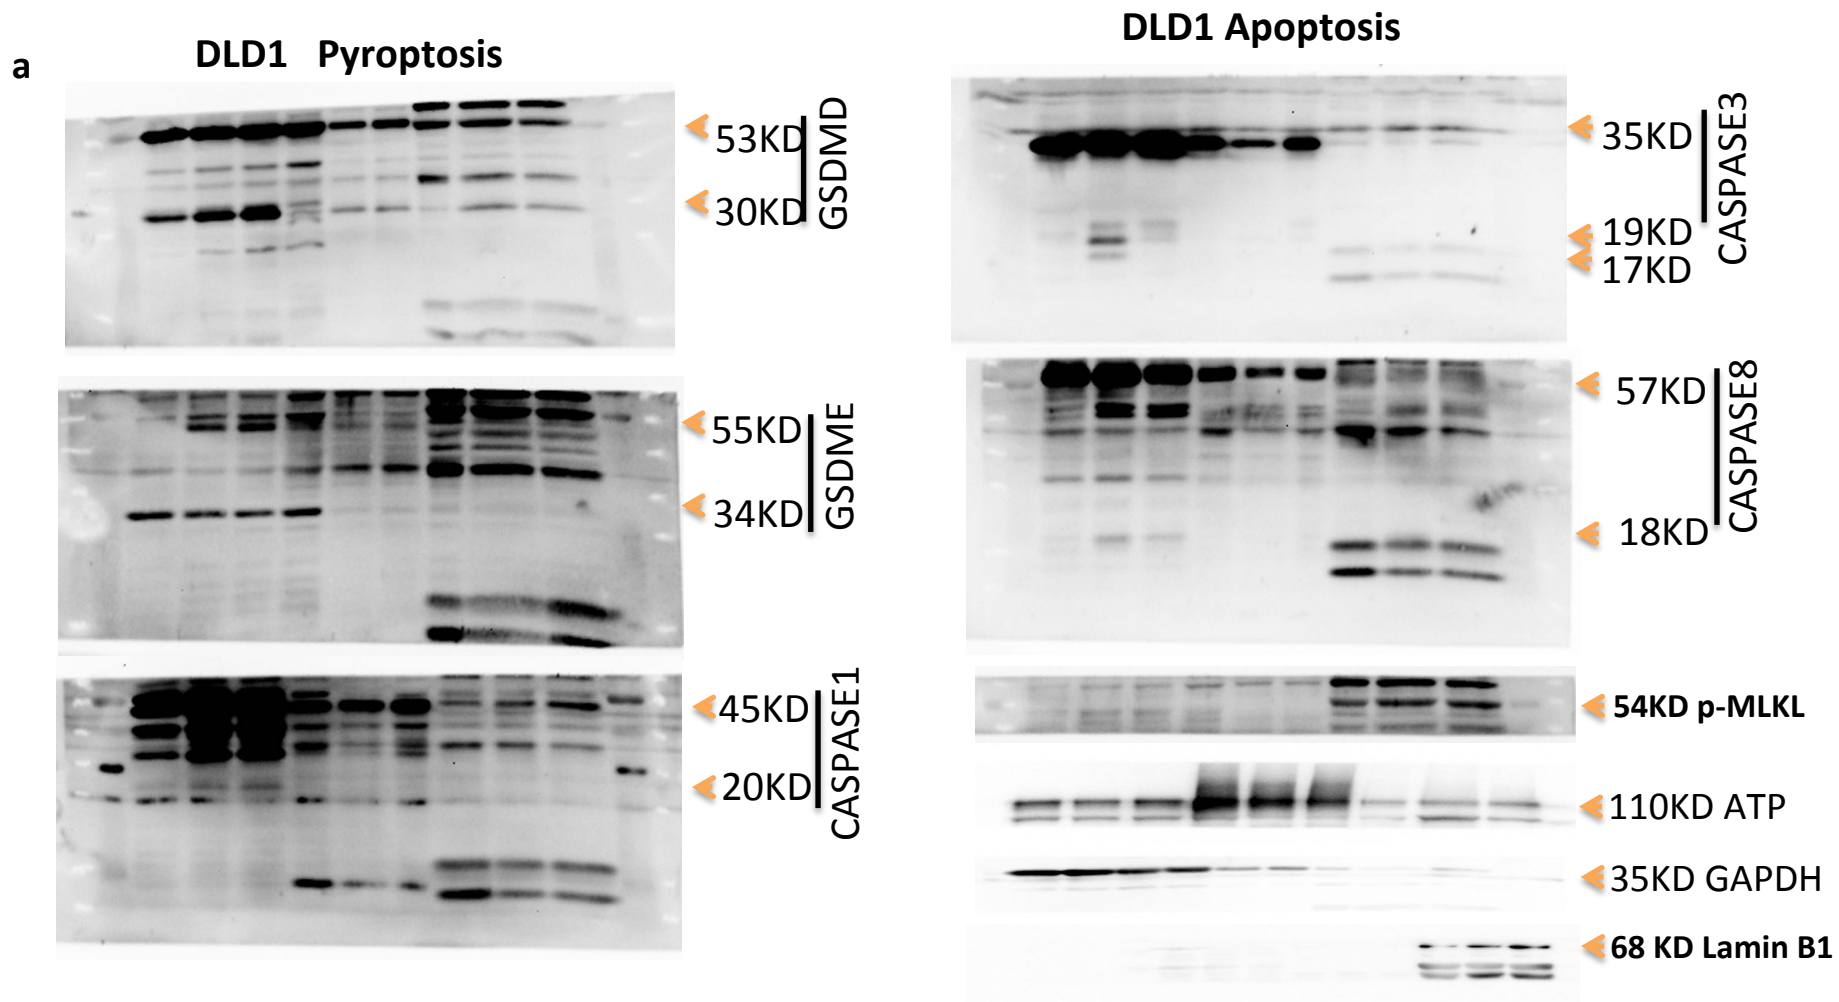

**Fig.4 | The effect of inhibitors on PANoptosis induced by co-treatment of IFN- $\gamma$  and TNF- $\alpha$ .**



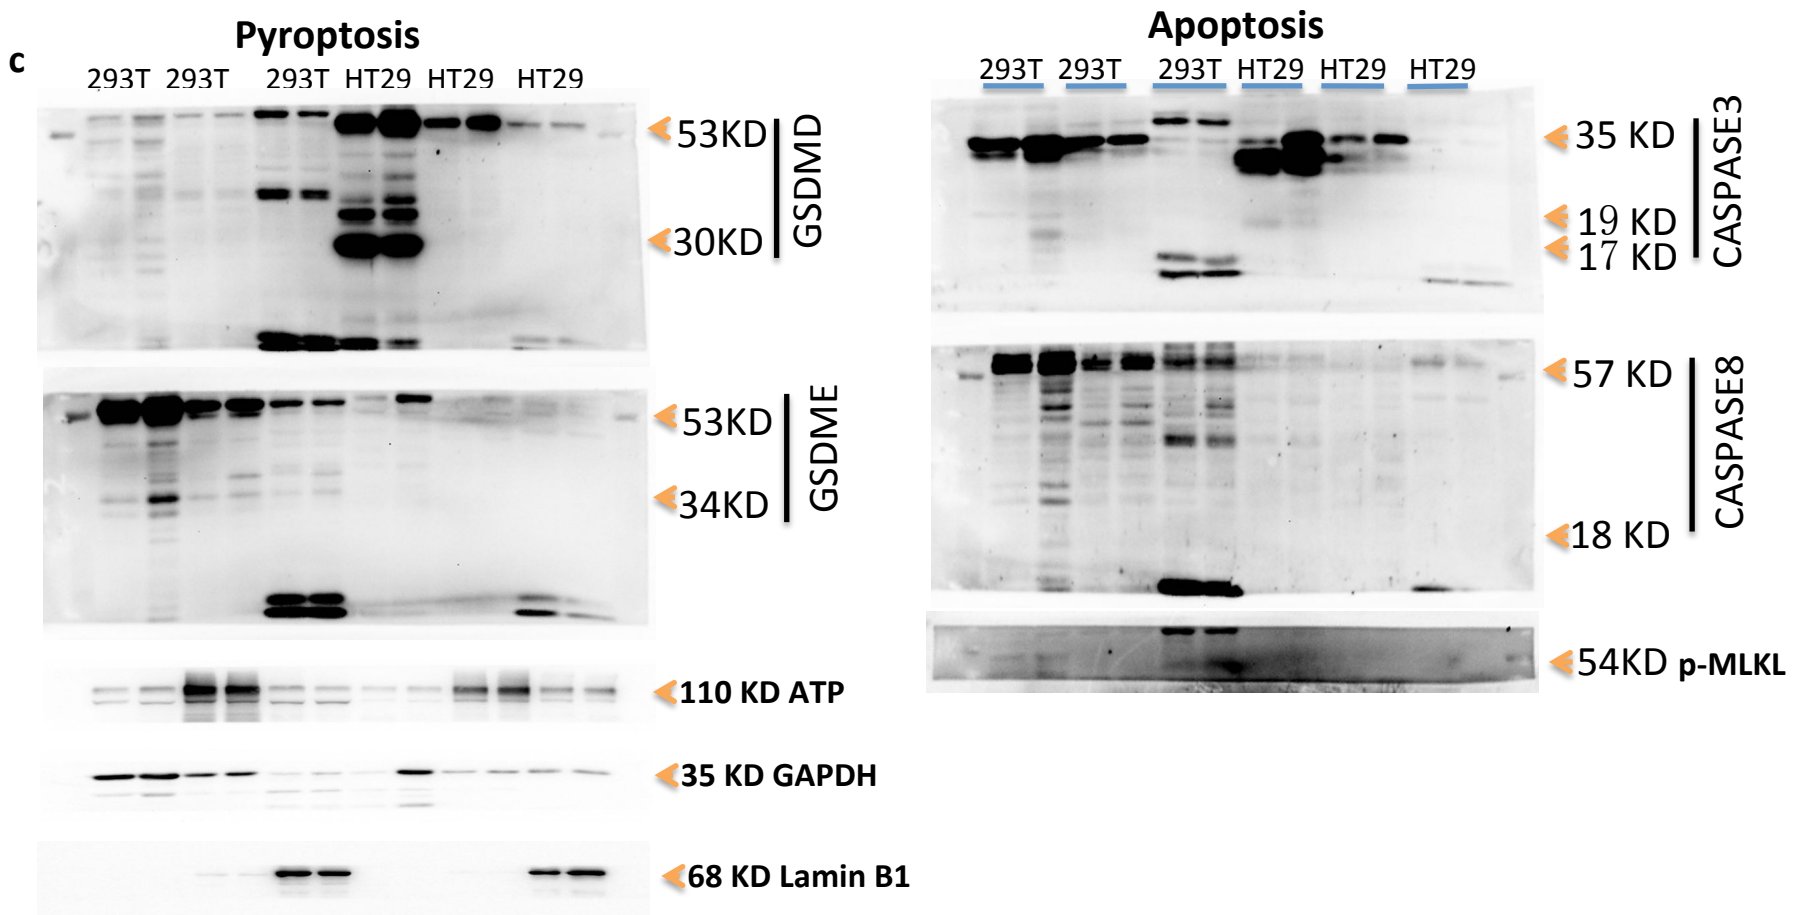

**Fig.4 | The effect of inhibitors on PANoptosis induced by co-treatment of IFN- $\gamma$  and TNF- $\alpha$ .**

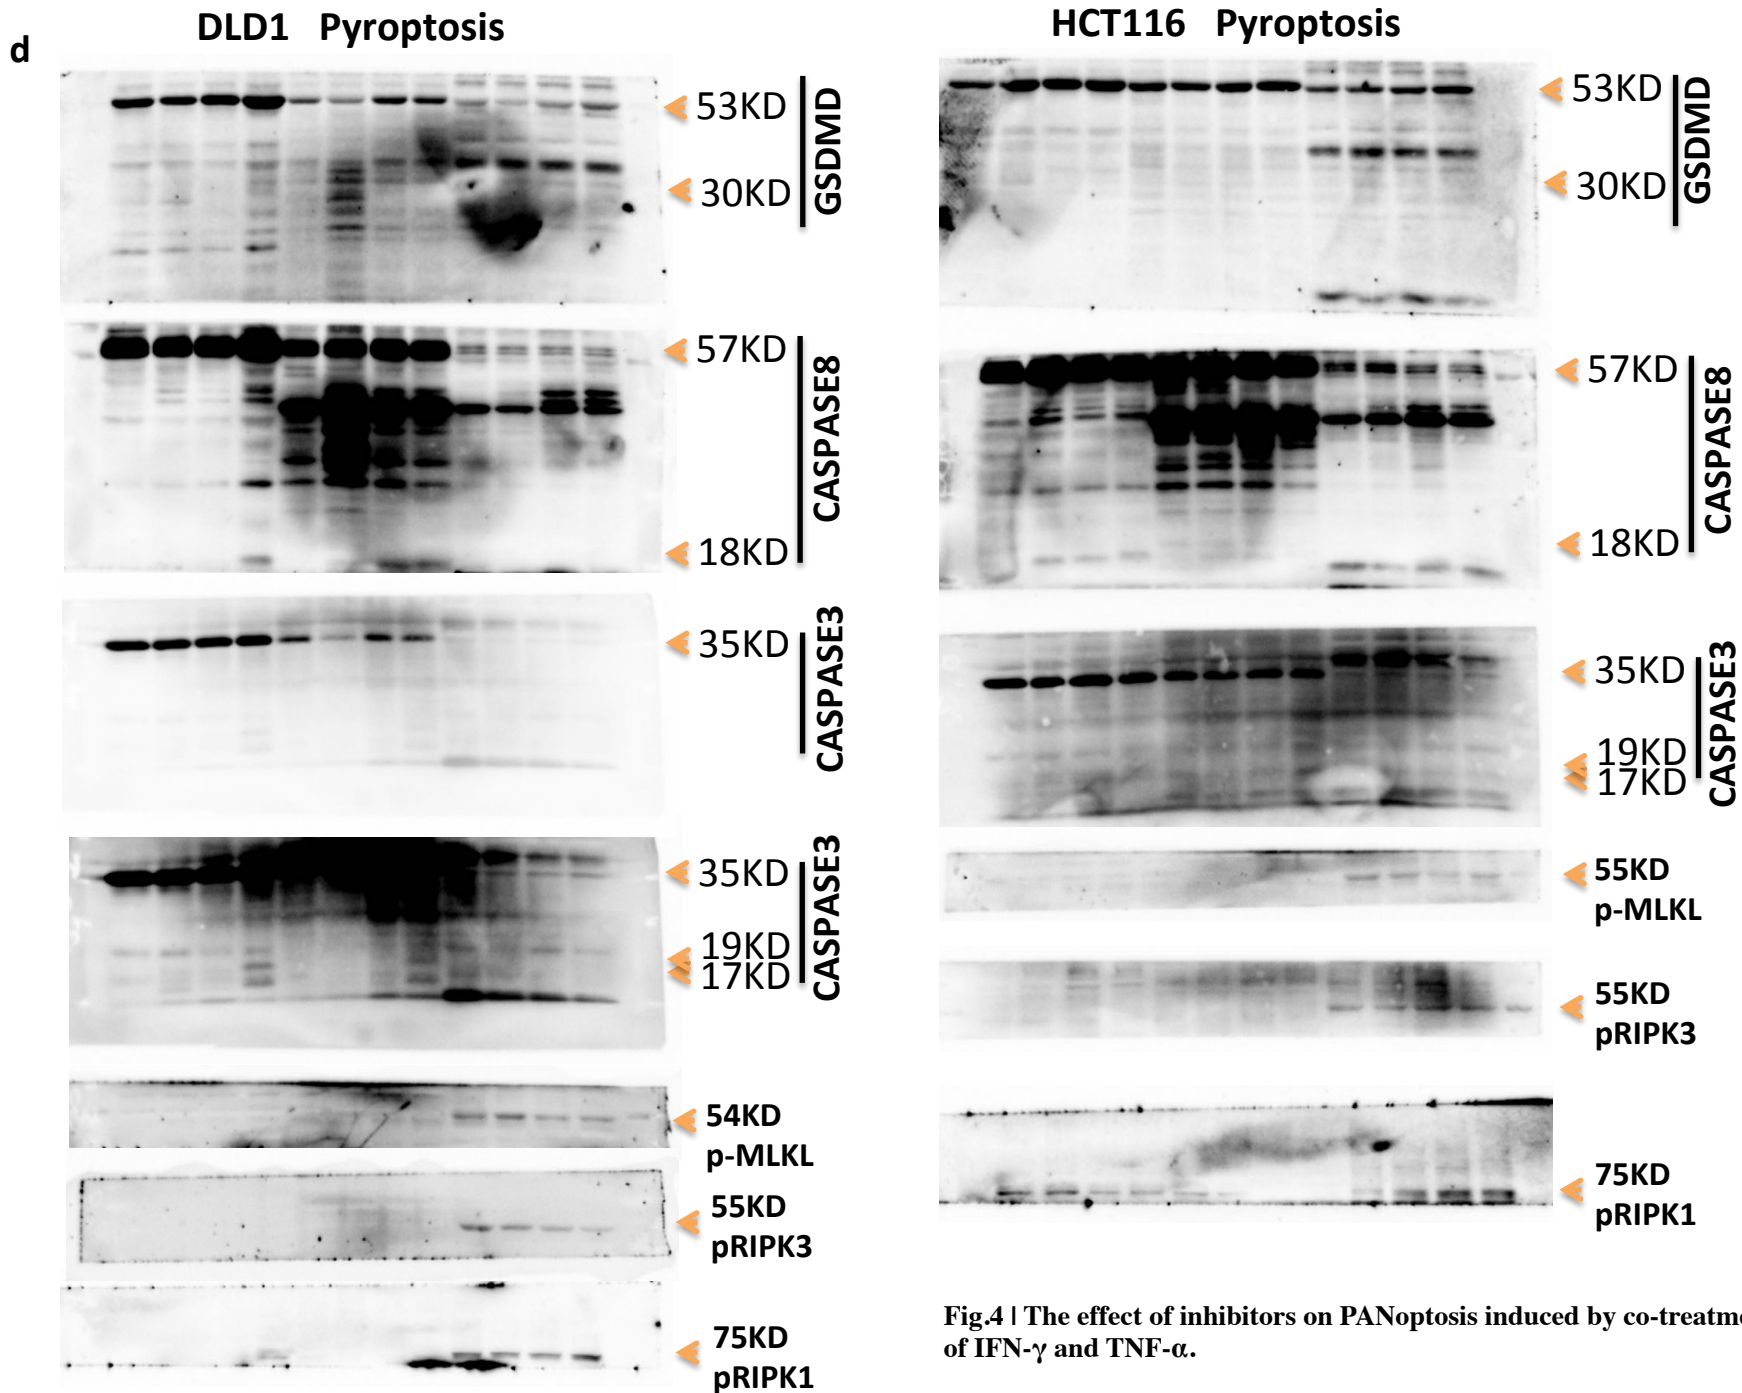

**Fig.4 | The effect of inhibitors on PANoptosis induced by co-treatment of IFN- $\gamma$  and TNF- $\alpha$ .**

**d DLD1 Pyroptosis**

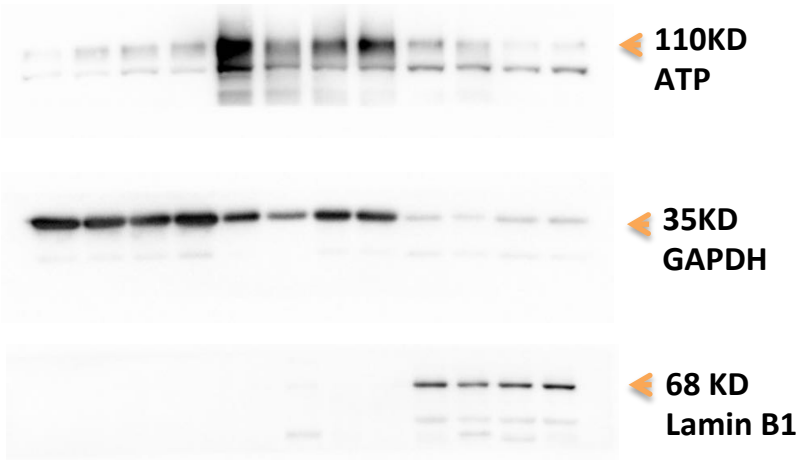

**HCT116 Pyroptosis**

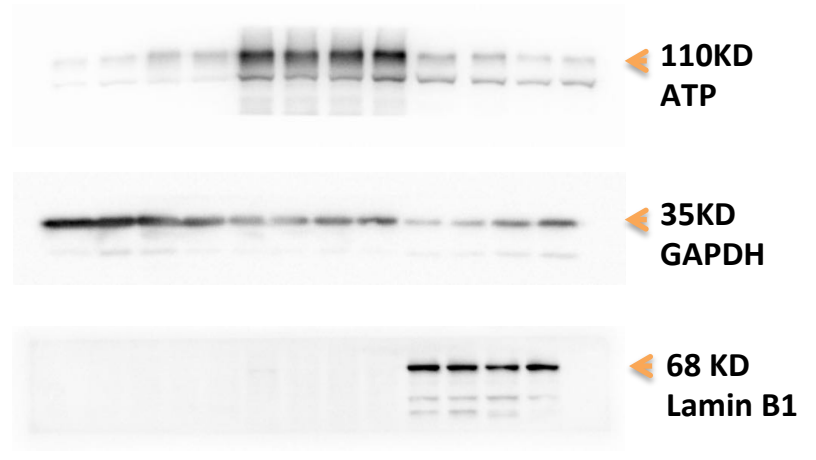

**Fig.4 | The effect of inhibitors on PANoptosis induced by co-treatment of IFN- $\gamma$  and TNF- $\alpha$ .**

e

### DLD1 Pyroptosis

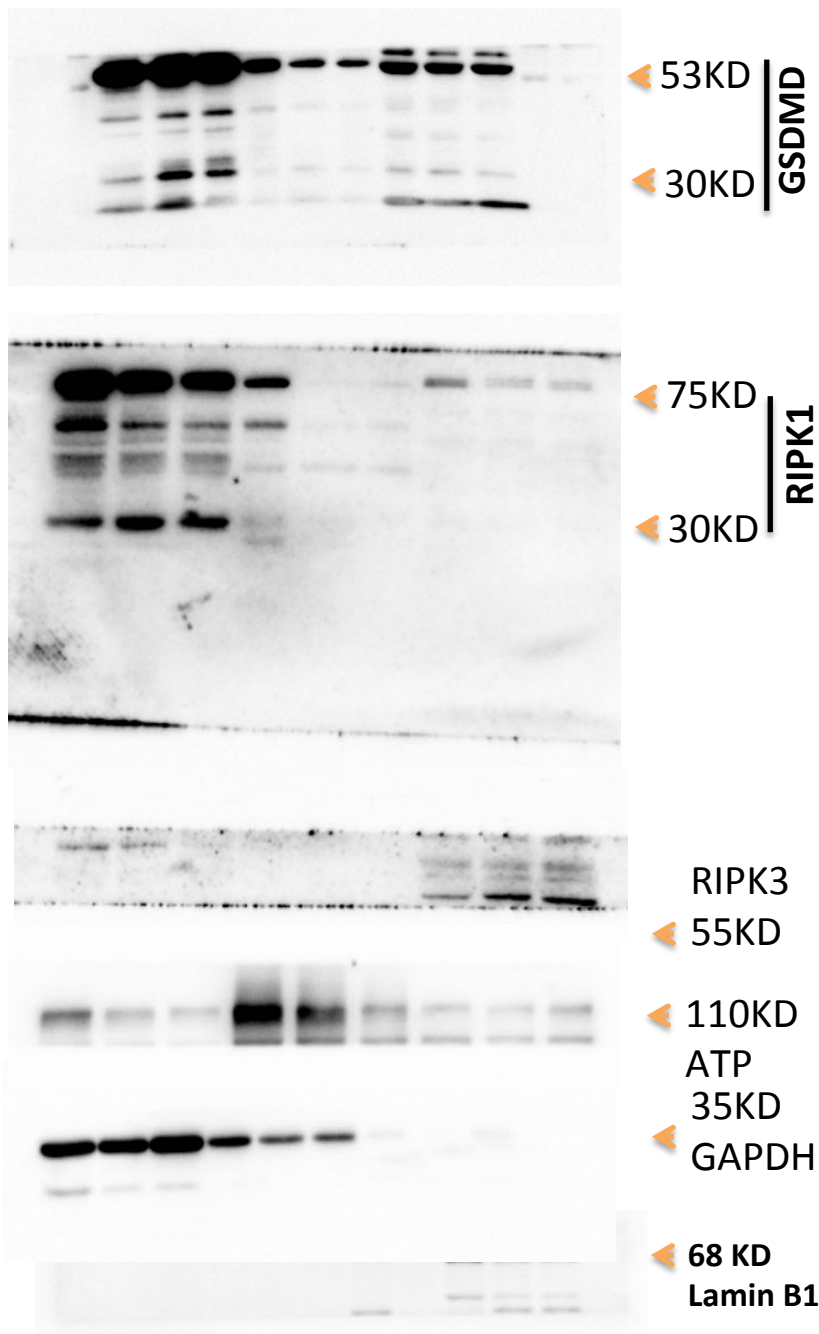

### HCT116 Pyroptosis

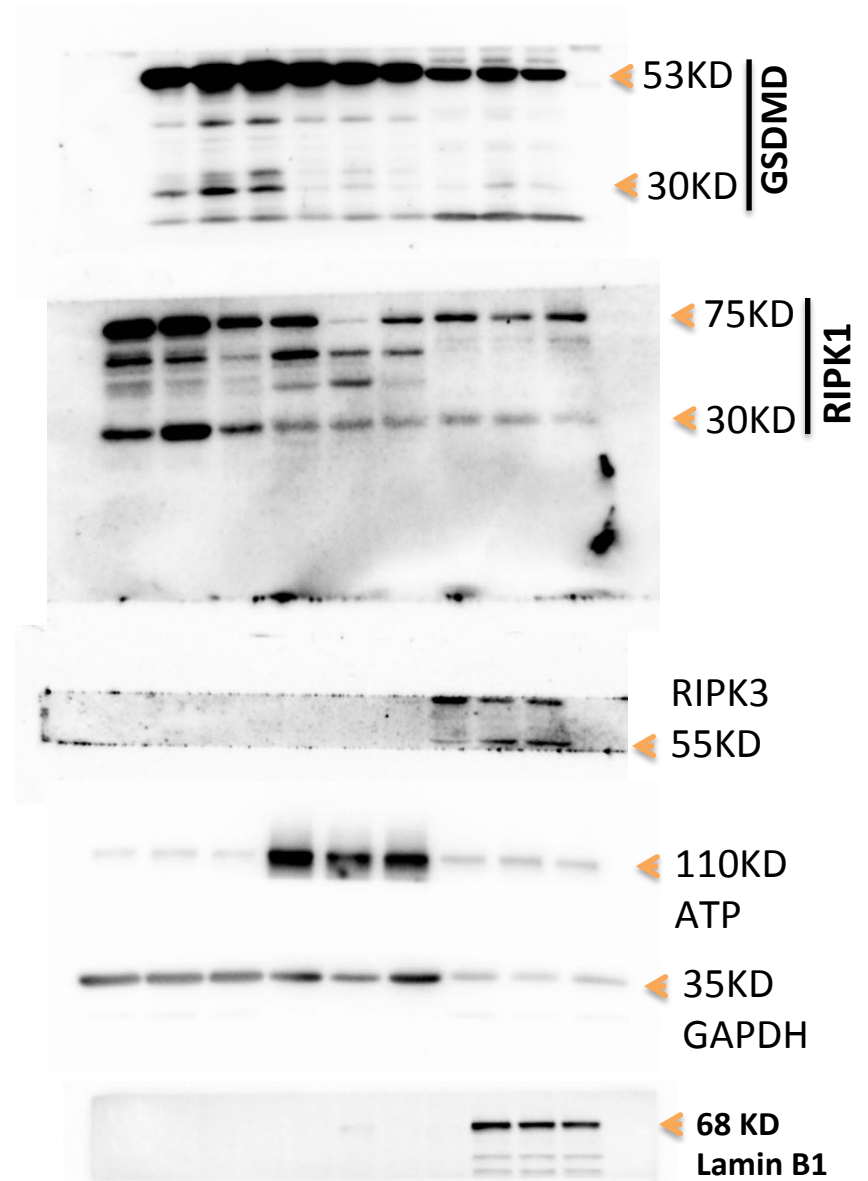

Fig.4 | The effect of inhibitors on PANoptosis induced by co-treatment of IFN- $\gamma$  and TNF- $\alpha$ .

f

**DLD1 Pyroptosis**

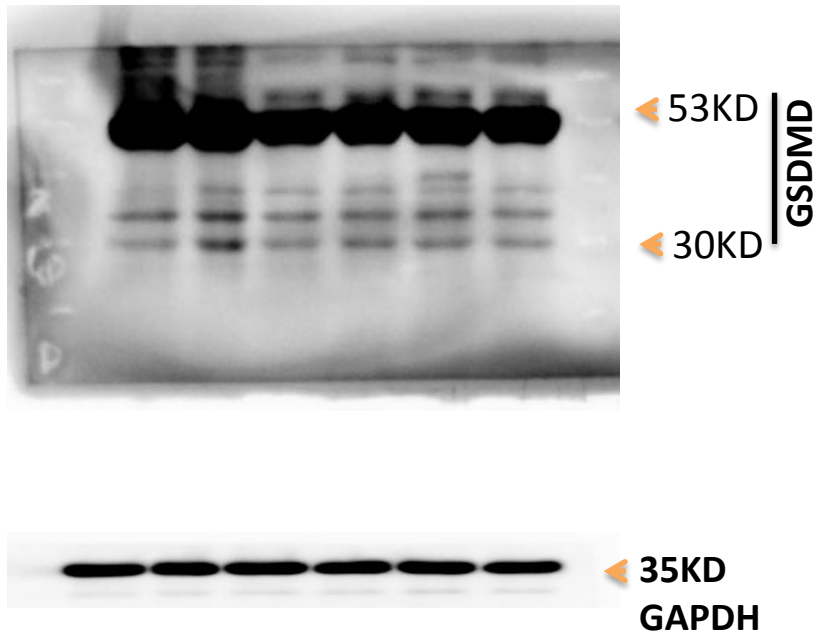

**HCT116 Pyroptosis**

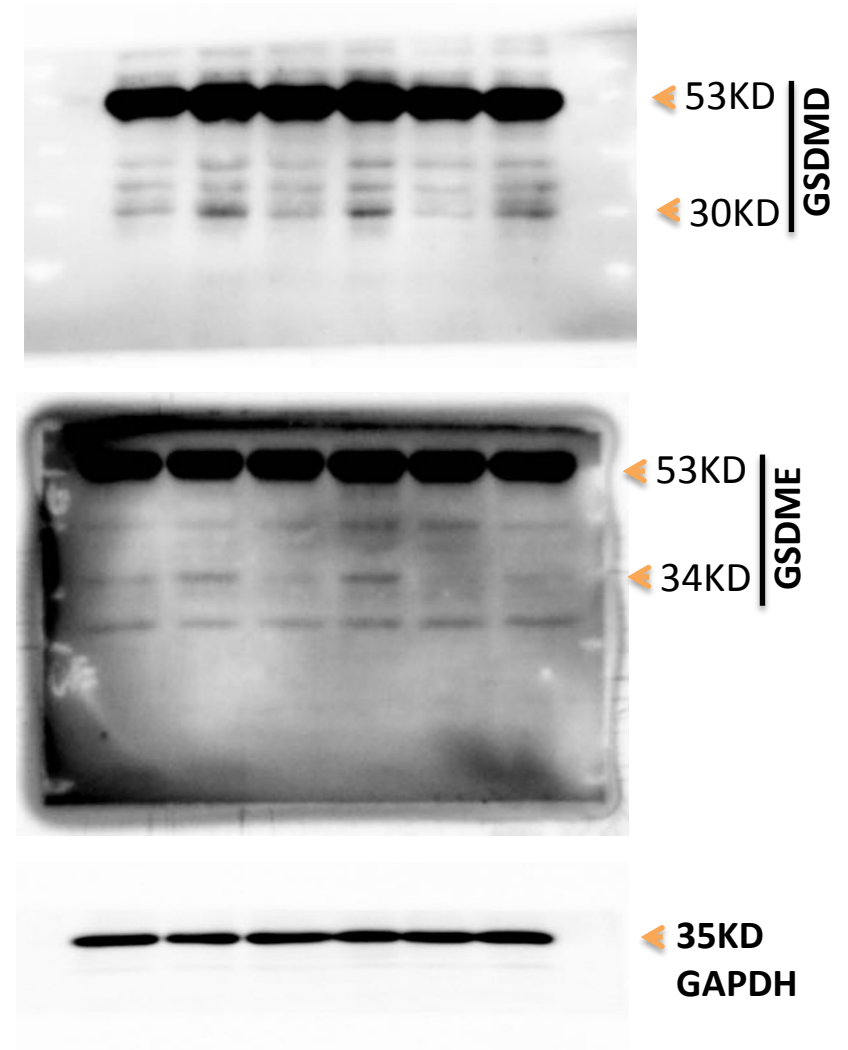

**Fig.4 | The effect of inhibitors on PANoptosis induced by co-treatment of IFN- $\gamma$  and TNF- $\alpha$ .**

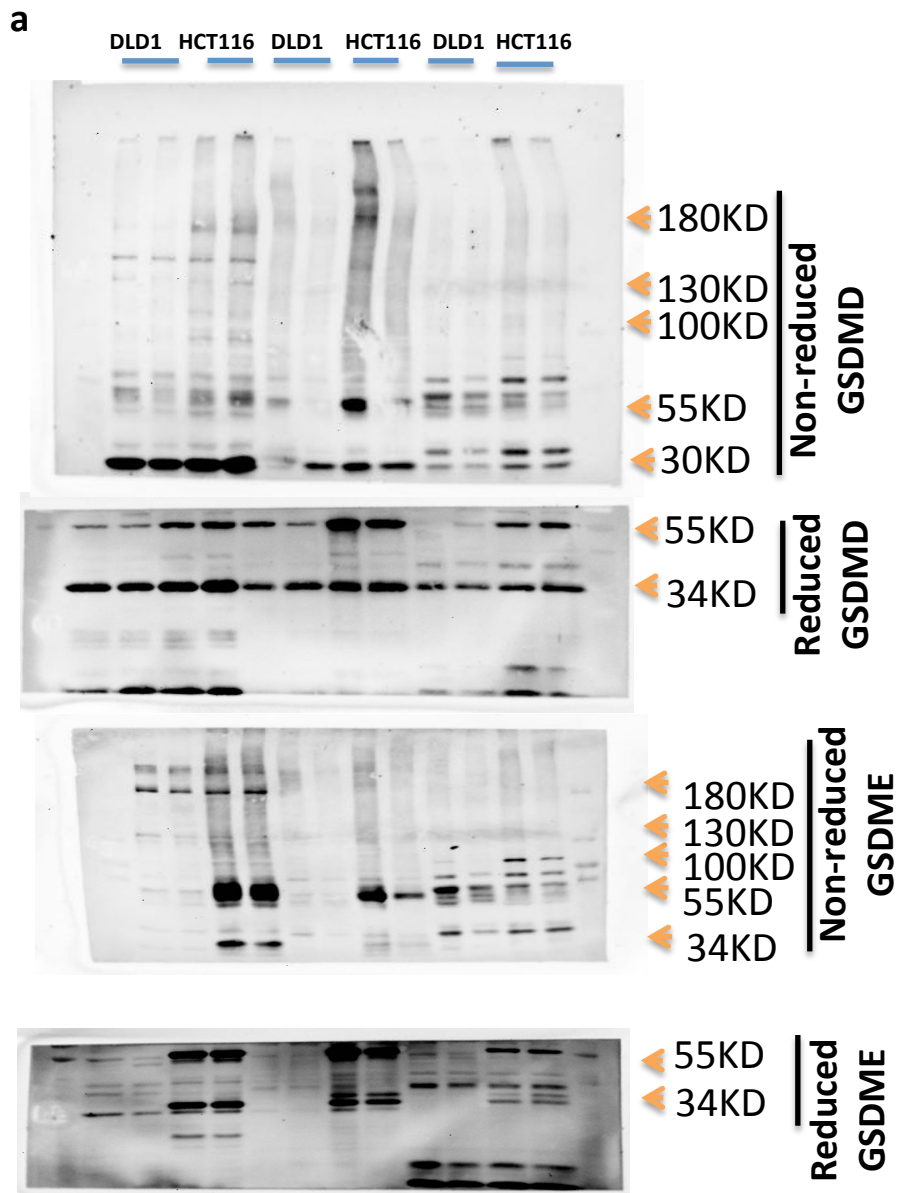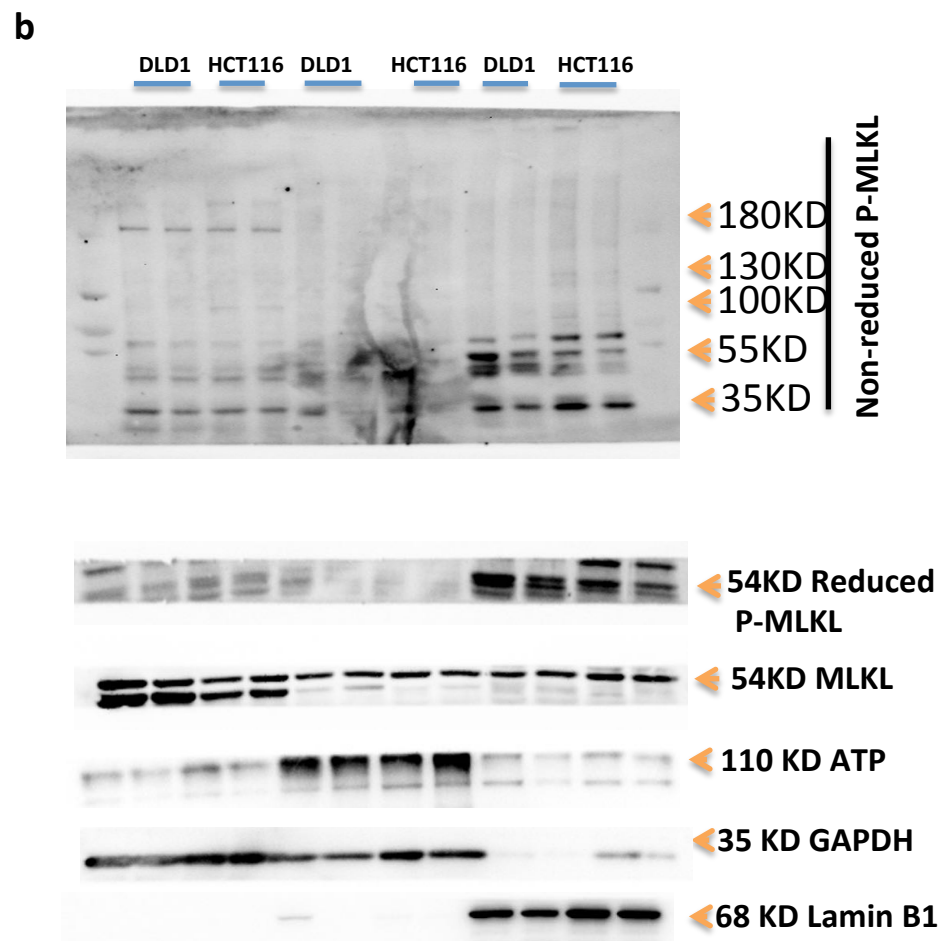

**Fig.5 | Oligomerization of NT-GSDMD, NT-GSDME and p-MLKL triggers PANoptosis after co-treatment of IFN- $\gamma$  + TNF- $\alpha$ .**



## Sensors of Cytoplasmic DNA fragments

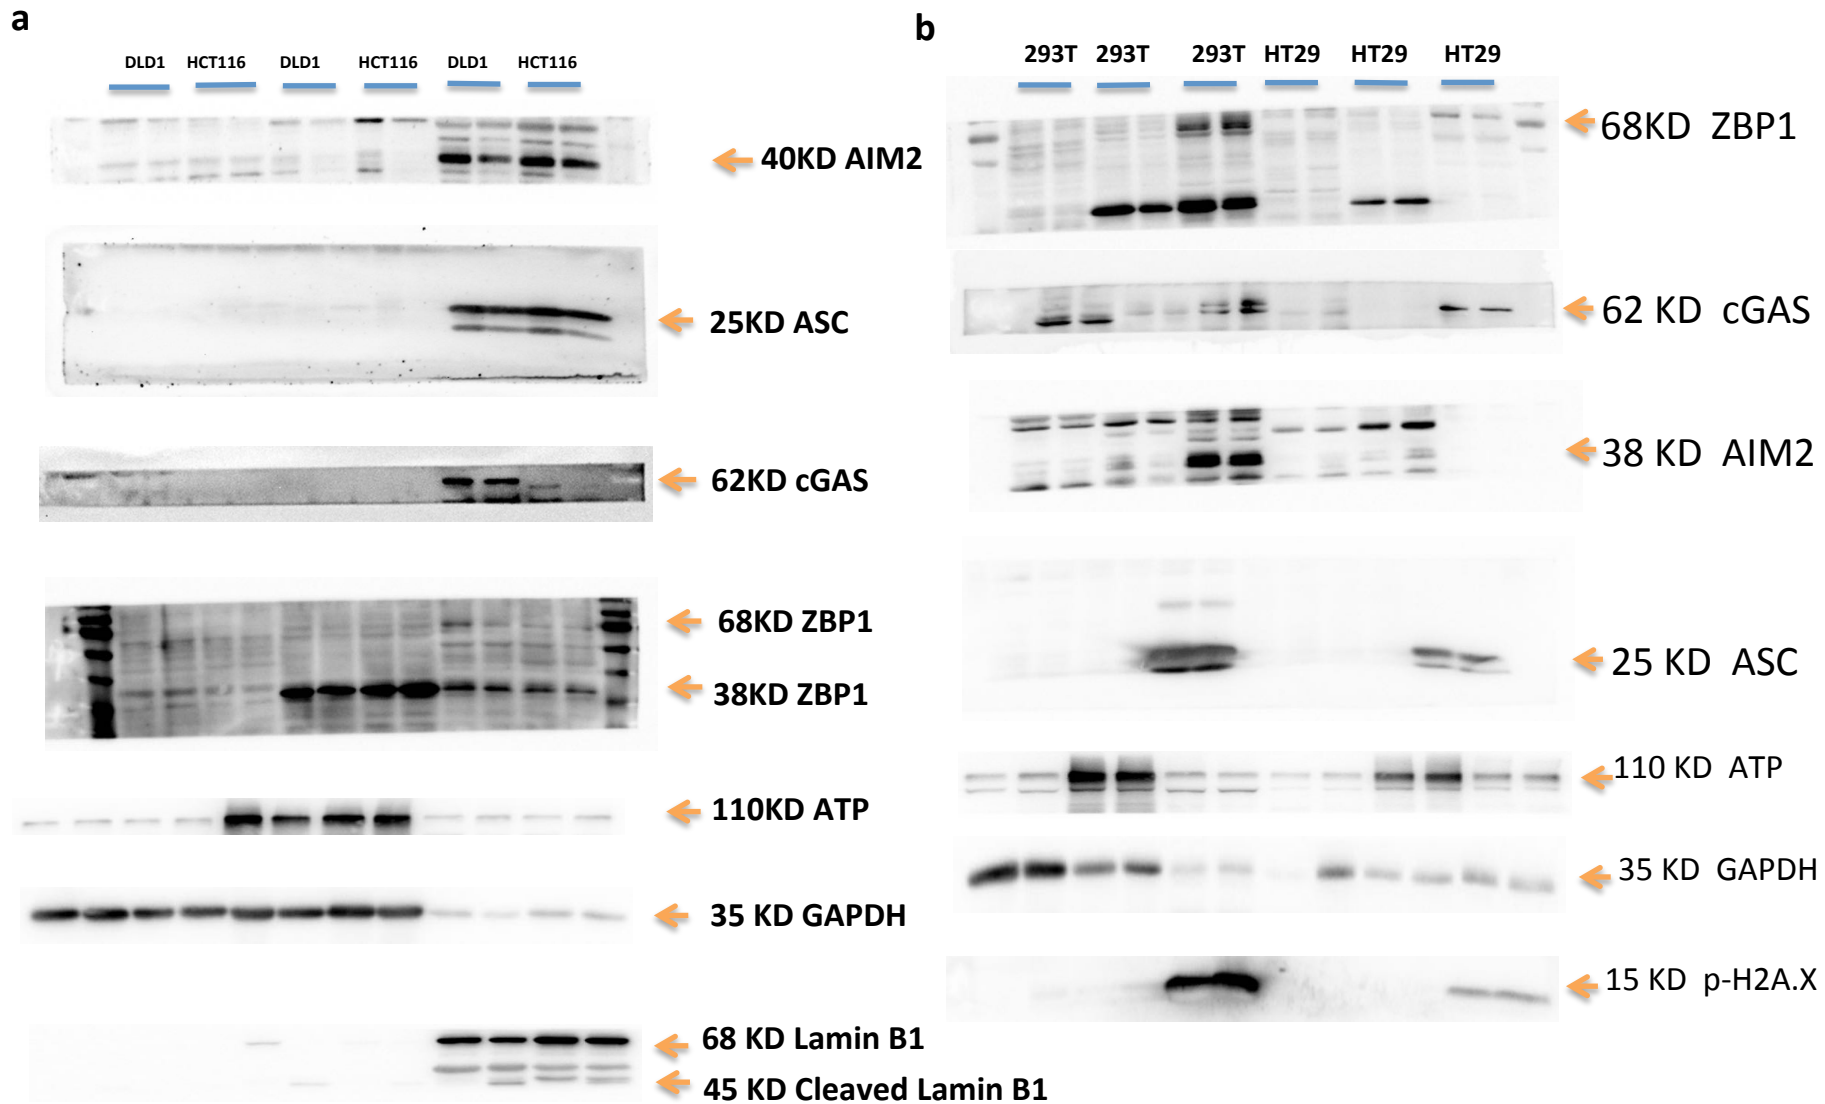

Fig.6 | DNA sensors for DNA fragments in Cancer cells with dMMR are in the nucleus, not in the cytoplasm.

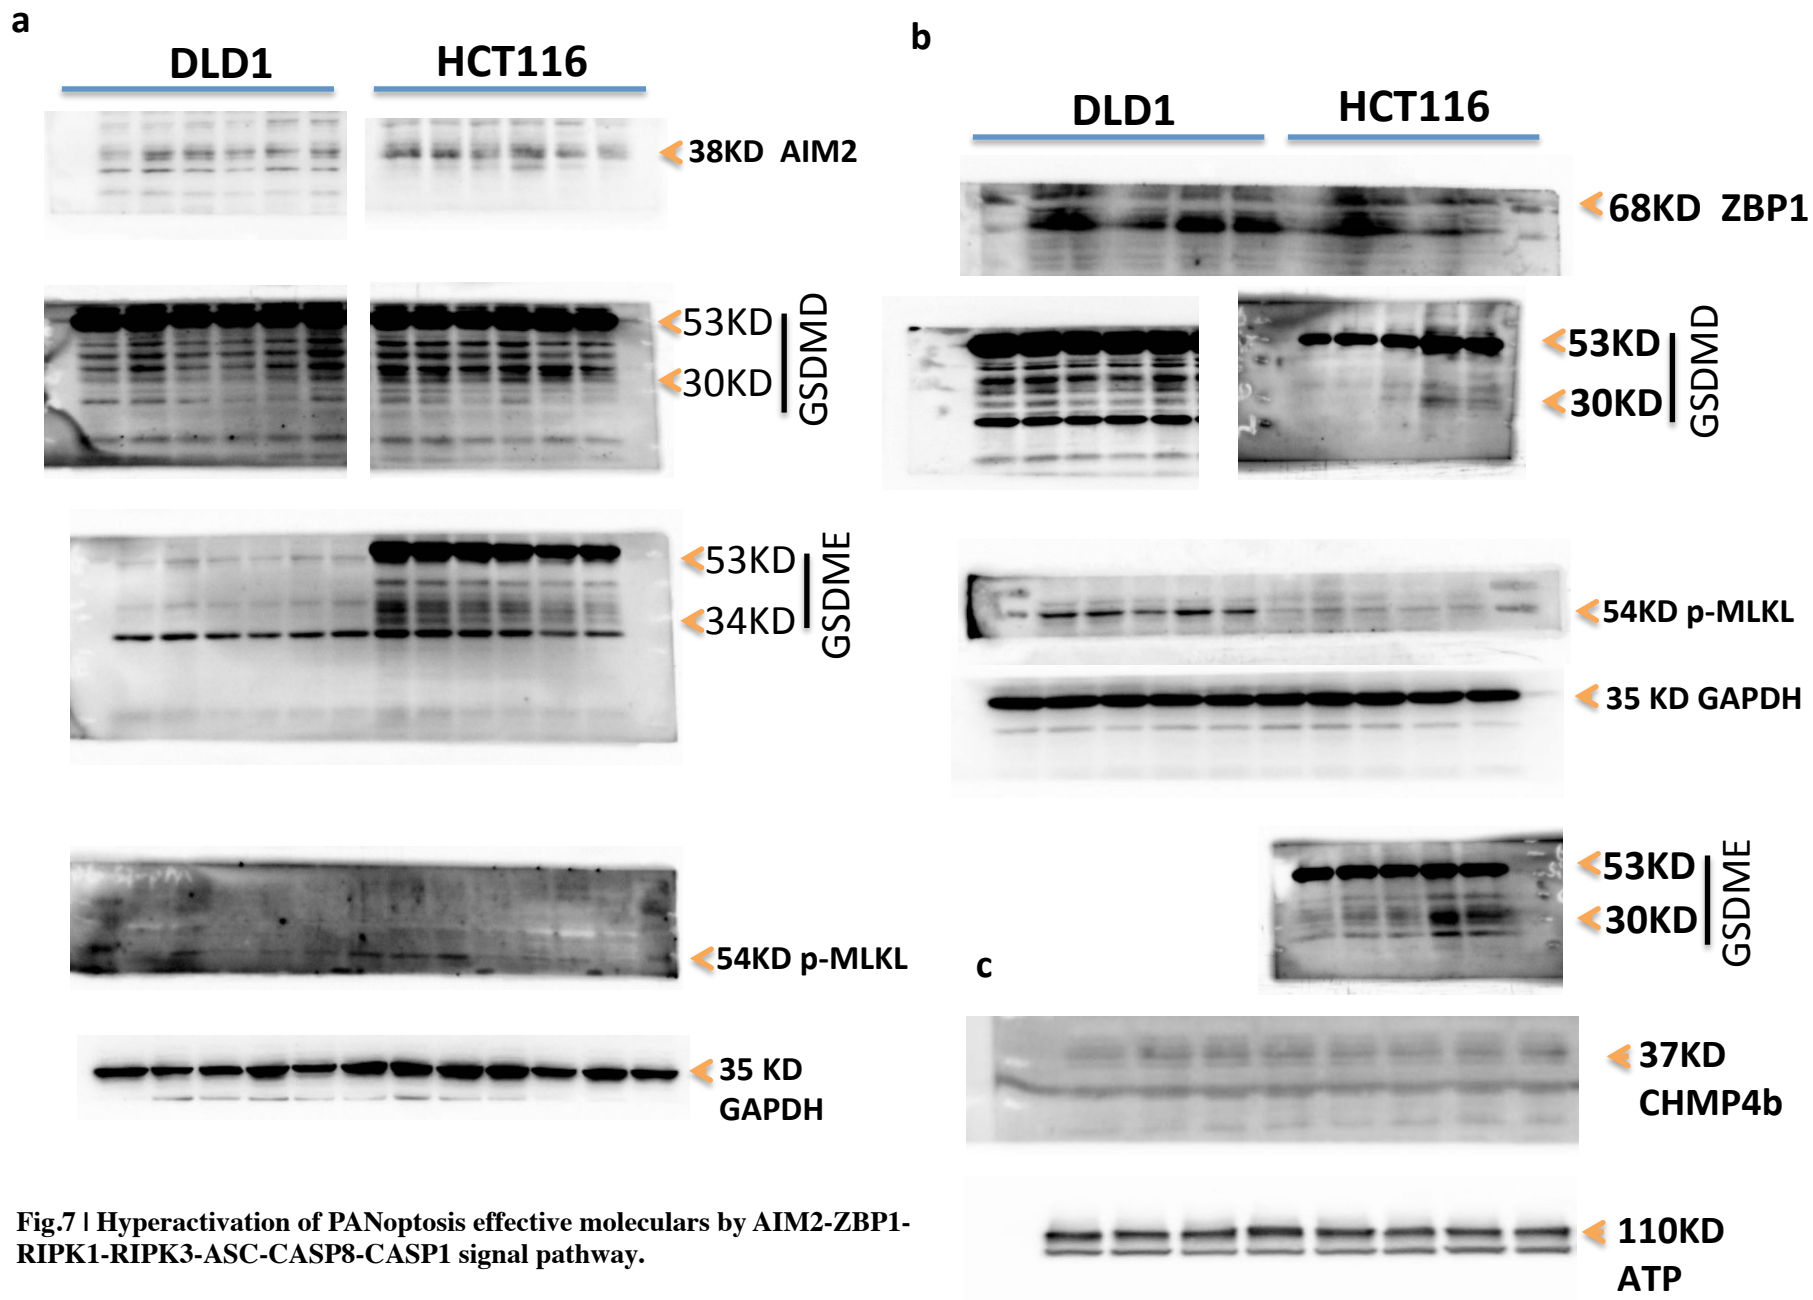

**Fig.7 | Hyperactivation of PANoptosis effective moleculars by AIM2-ZBP1-RIPK1-RIPK3-ASC-CASP8-CASP1 signal pathway.**

d

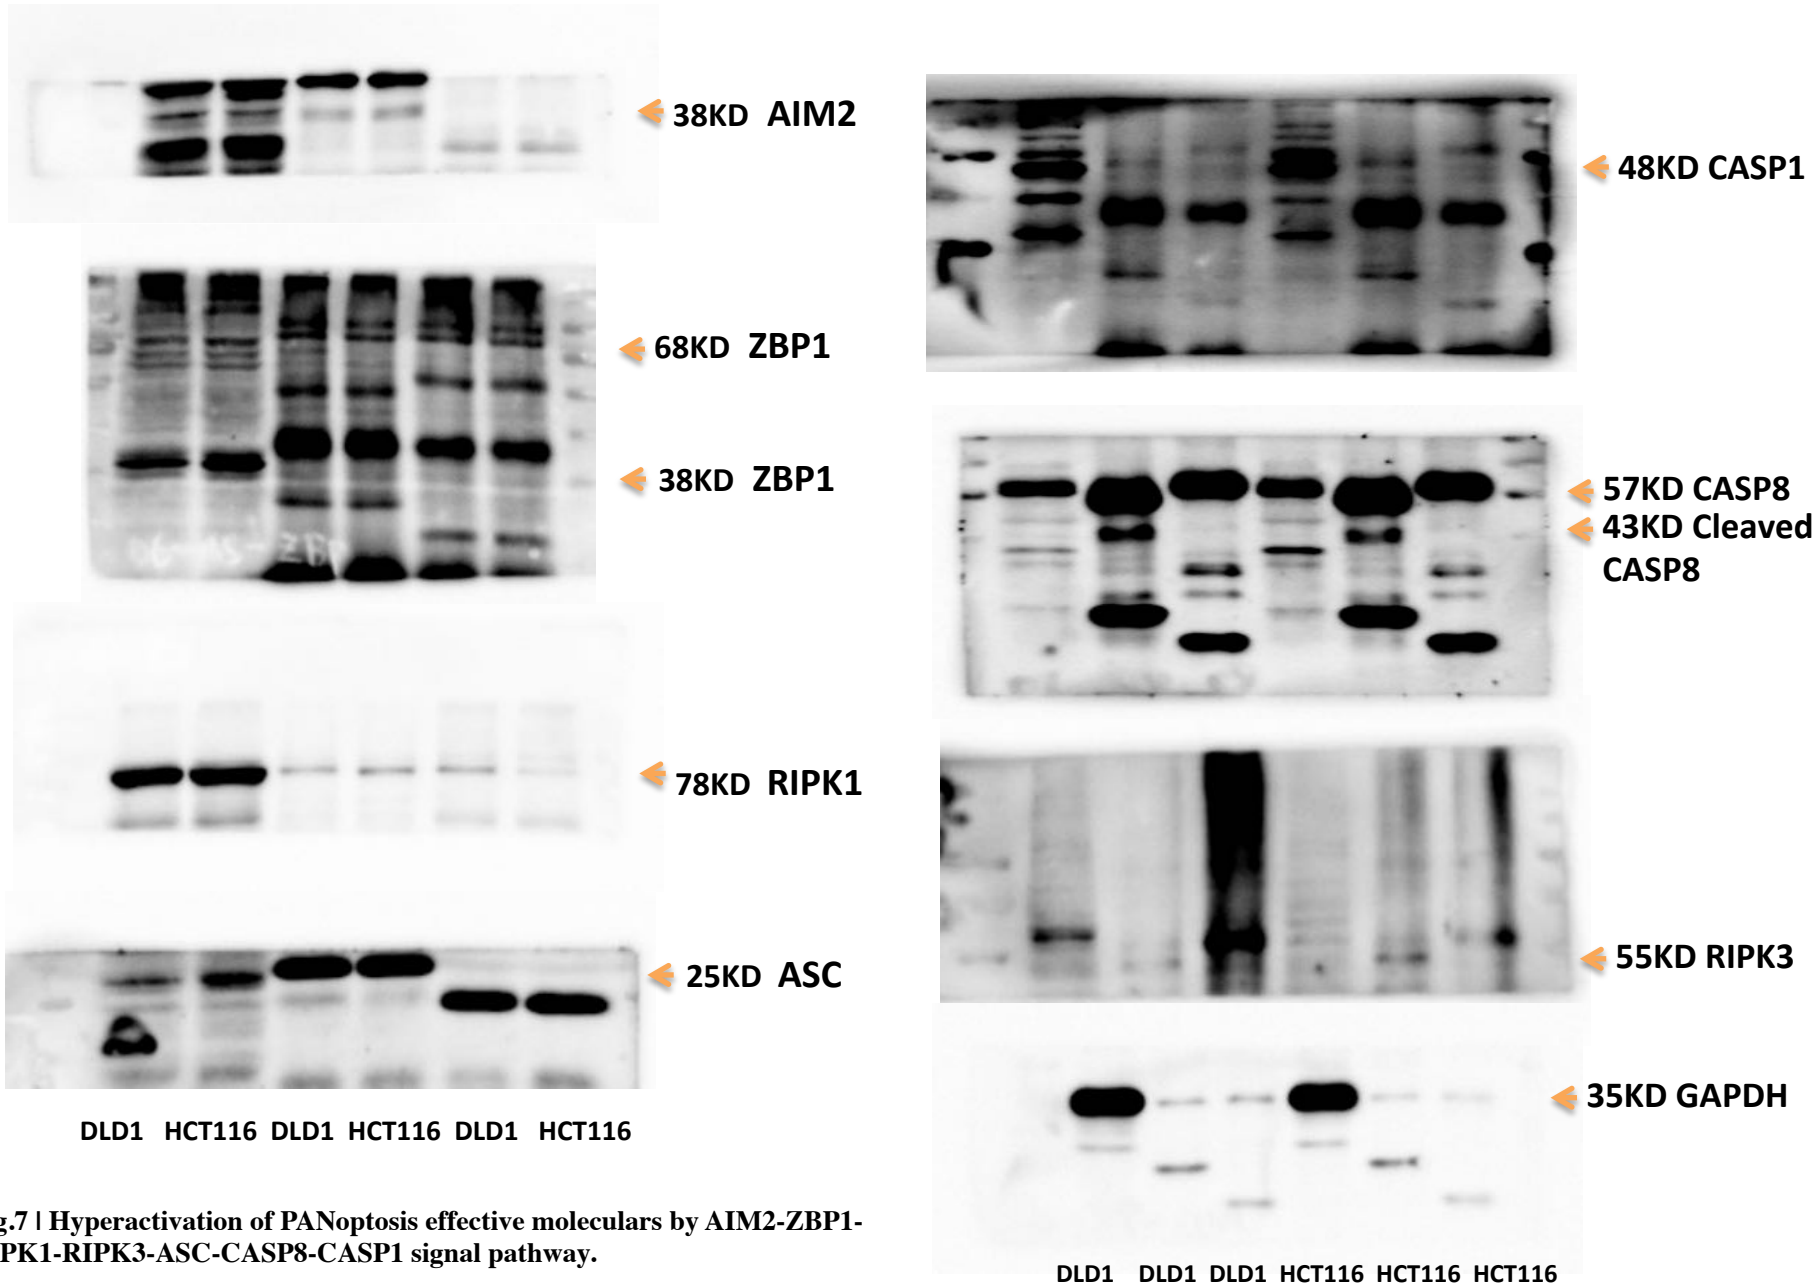

Fig.7 | Hyperactivation of PANoptosis effective molecules by AIM2-ZBP1-RIPK1-RIPK3-ASC-CASP8-CASP1 signal pathway.

a

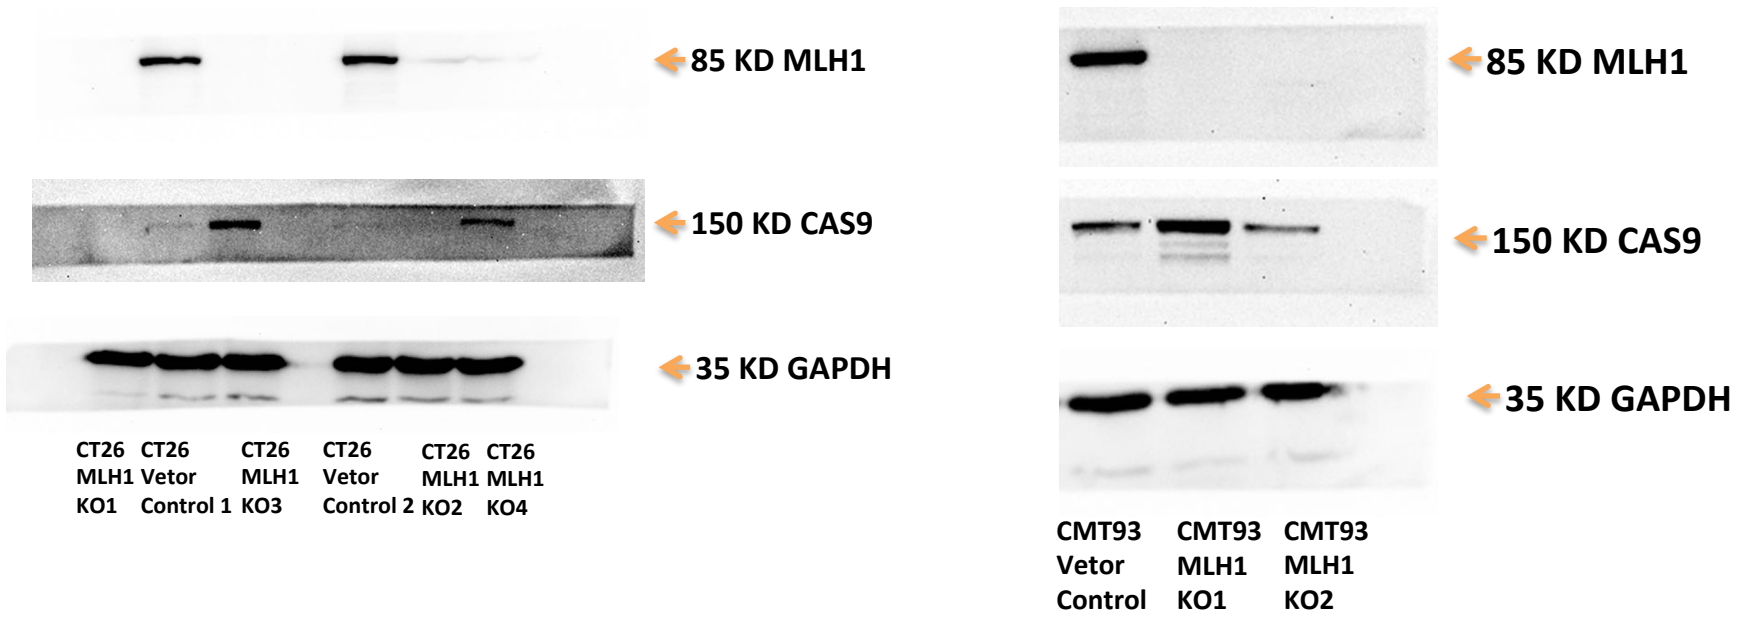

**Fig.10 | *Mlh1* knockout CT26 and CMT93 undergo natural hyperactivation of GSDMD, GSDME and p-MLKL.**

**b**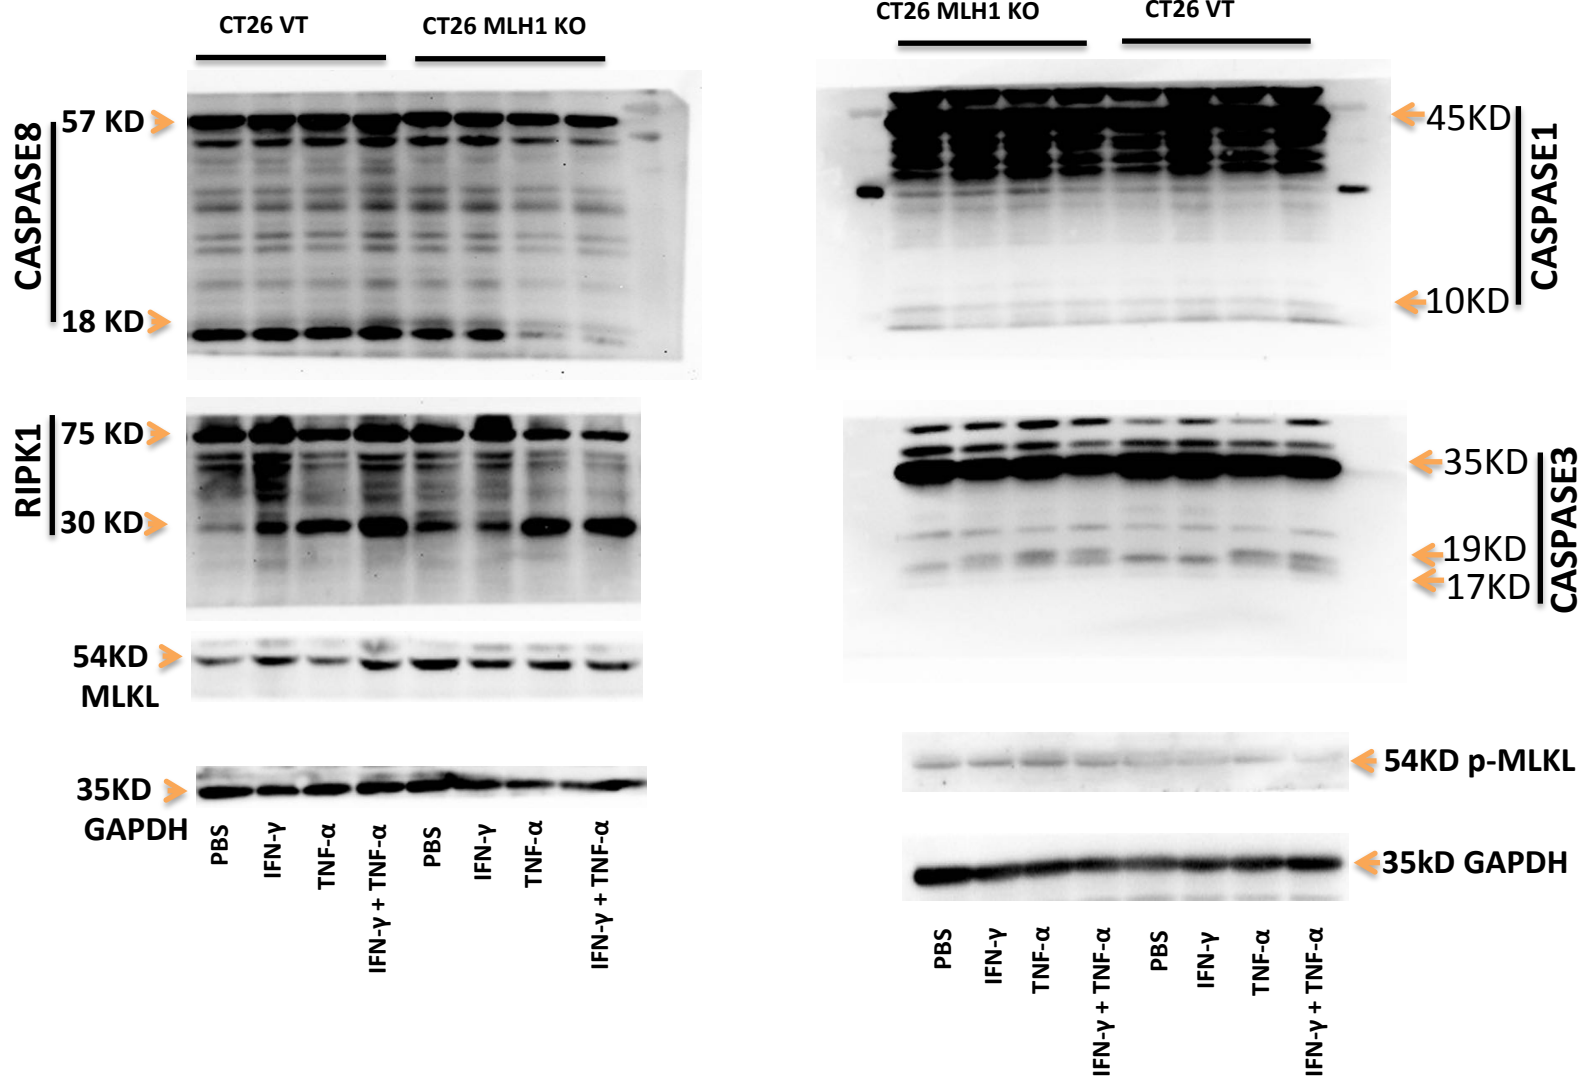

Fig.10 | *Mlh1* knockout CT26 and CMT93 undergo natural hyperactivation of GSDMD, GSDME and p-MLKL.

C

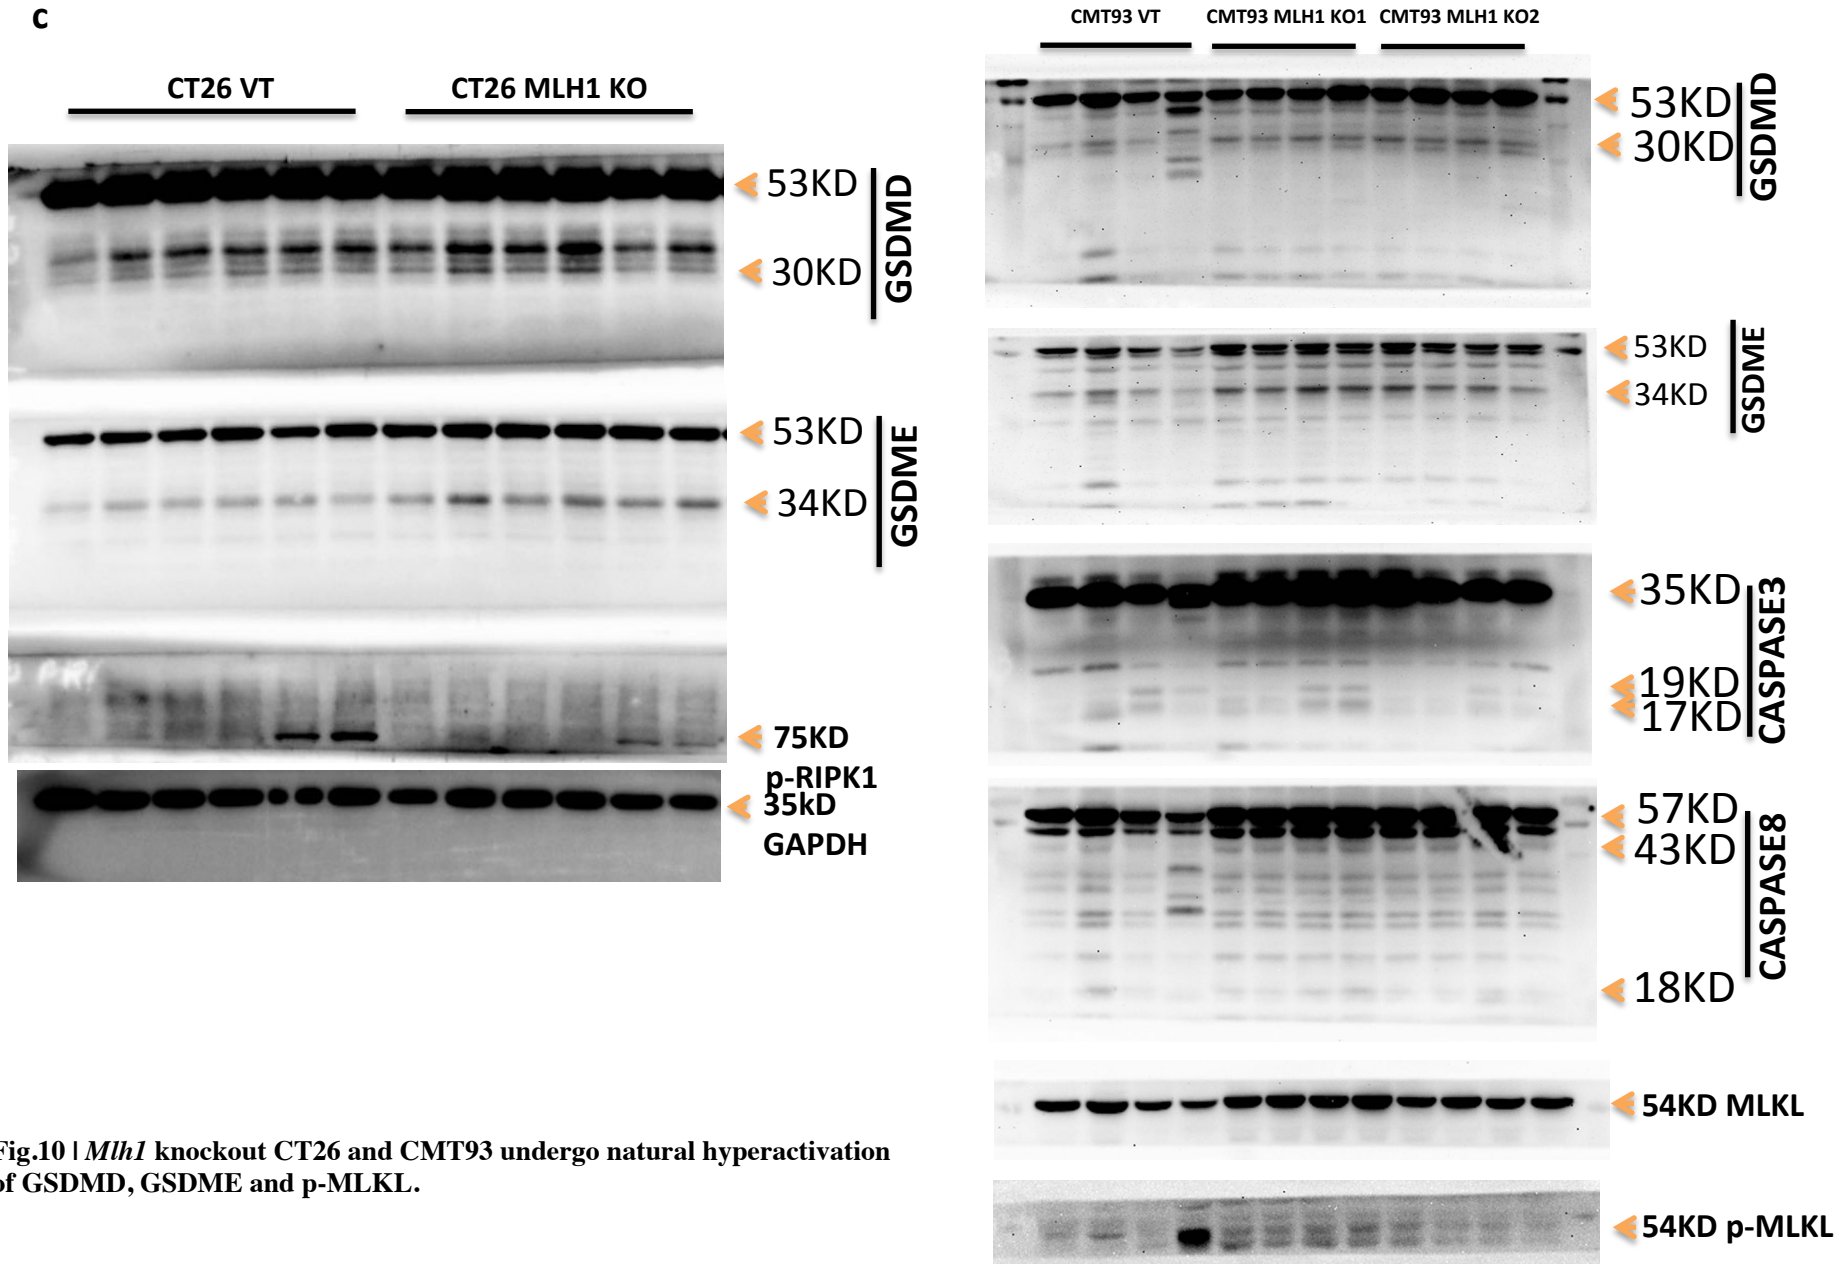

Fig.10 | *Mlh1* knockout CT26 and CMT93 undergo natural hyperactivation of GSDMD, GSDME and p-MLKL.

c

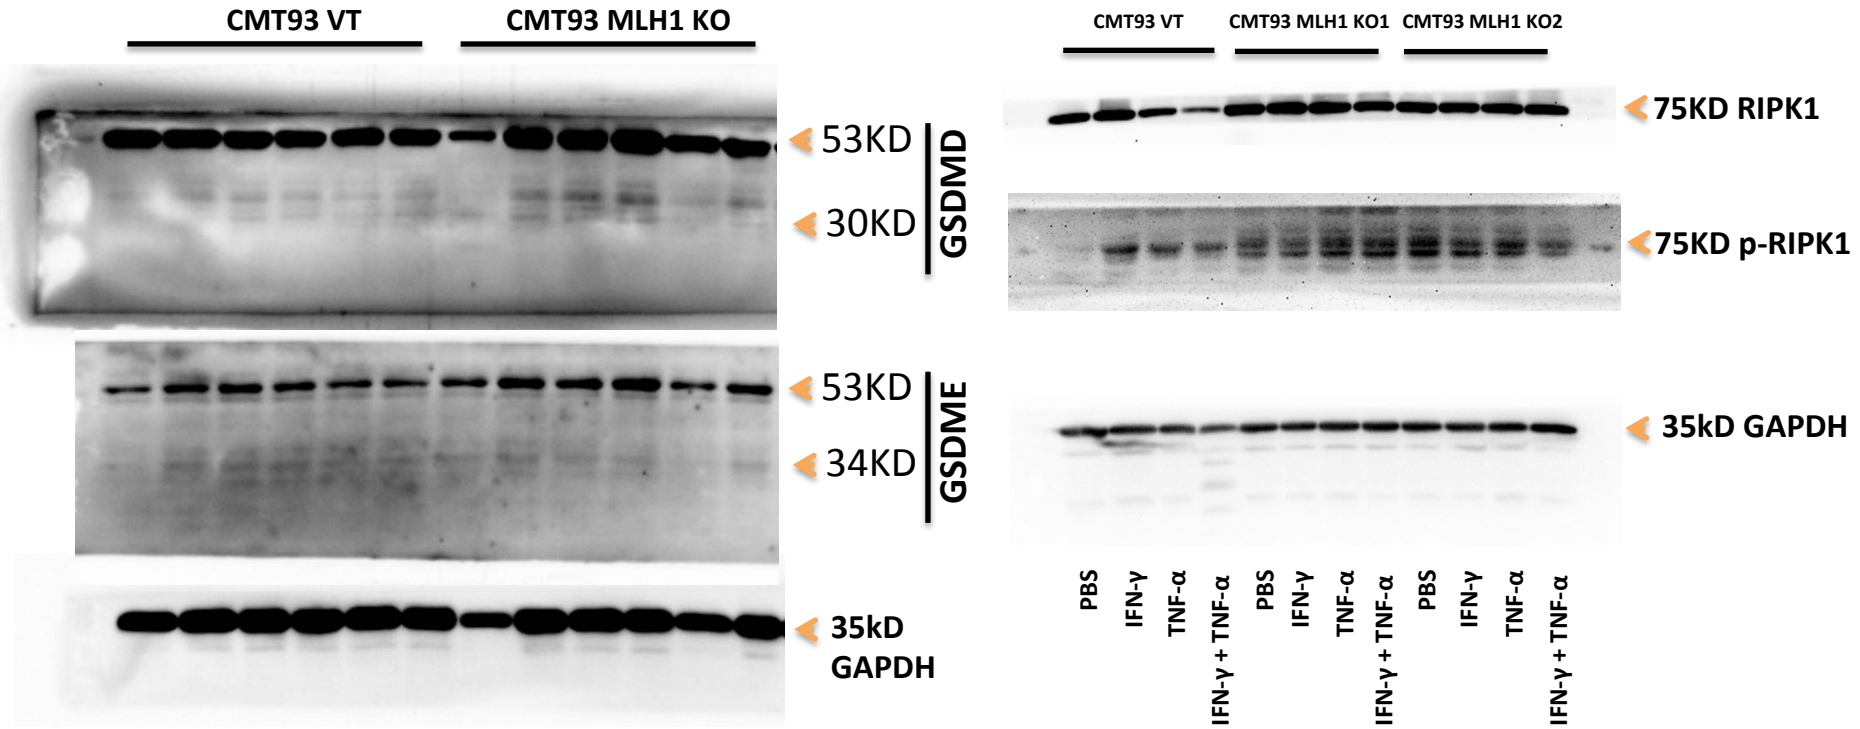

Fig.10 | *Mlh1* knockout CT26 and CMT93 undergo natural hyperactivation of GSDMD, GSDME and p-MLKL.

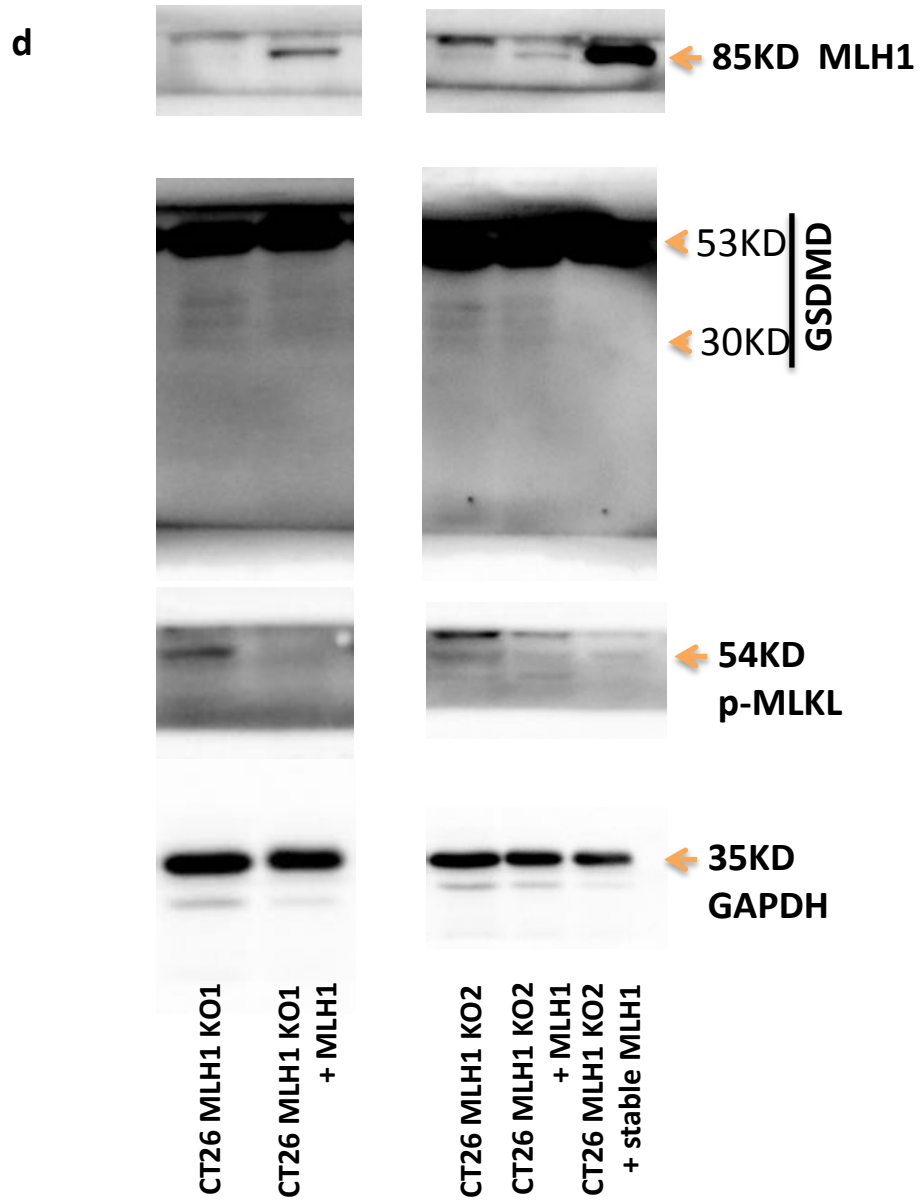

**Fig.10 | *Mlh1* knockout CT26 and CMT93 undergo natural hyperactivation of GSDMD, GSDME and p-MLKL.**
